# Supplementary material for: CDK16 Phosphorylates and Degrades p53 to Promote Radioresistance and Predicts Prognosis in Lung Cancer
Source: PubMed Central journal article supplement — Theranostics. 2018 Jan 1;8(3):650–62. doi: 10.7150/thno.21963 (PMC5771083; doi:10.7150/thno.21963), 2018-01-01
Supplement: thnov08p0650s1.pdf [file thnov08p0650s1.pdf]

**Figure S1.** CDK16 knockdown cells were reconstituted with siRNA-resistant CDK16 plasmid (Myc-CDK16-R#1 and Myc-CDK16-R#2) as indicated. The ratio shows relative p53 protein expression normalized for GAPDH (scramble, set at 1)

**Figure S2.** CDK16 knockdown did not affect the protein level of MDM2. A549 cells were transfected with the indicated siRNAs. 48h later, cells were harvested and analyzed by immunoblotting. The ratio shows relative MDM2 protein expression normalized for GAPDH (scramble, set at 1)

**Figure S3.** A549 and H292 cells were either untreated or irradiated (8 Gy). After 24 h, cells were collected analyzed by immunoblotting. The ratio shows relative CDK16 protein expression normalized for GAPDH (control, set at 1)

**Figure S1.**

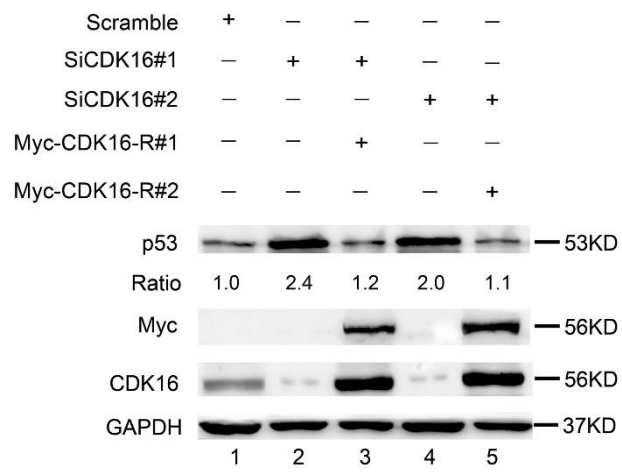

**Figure S2.**

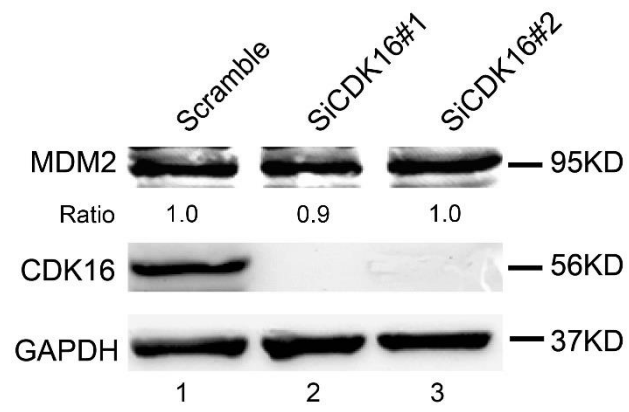

**Figure S3.**

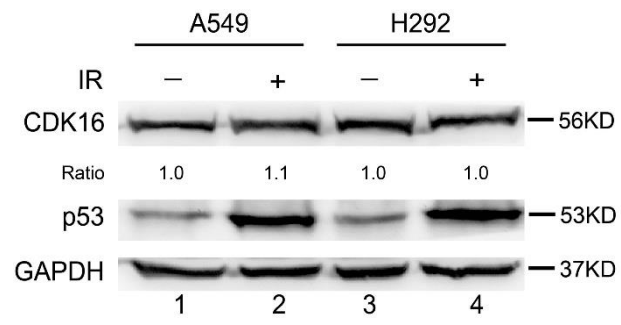

**Table S1.** Sequences of primers used for Real-time quantitative PCR

| Genes | Sequences (5'--3')                                            | Size (bp) |
|-------|---------------------------------------------------------------|-----------|
| P53   | F <sup>a</sup> : GCTTTCACGACGGTGAC<br>R: GCTCGACGCTAGGATCTGAC | 97        |
| P21   | F: TACCCTTGTGCCTCGCTCAG<br>R: GAGAAGATCAGCCGGCGTTT            | 129       |
| NOXA  | F: CGGGCTCTGTAGCTGAGTG<br>R: TTCTGCCGGAAGTTCAGTTT             | 160       |
| PUMA  | F: ACGACCTCAACGCACAGTACG<br>R: GTAAGGGCAGGAGTCCCATGATG        | 108       |
| MDM2  | F: GAATCTACAGGGACGCCATC<br>R: TCCTGATCCAACCAATCACC            | 77        |
| CDK16 | F: TATCCACACGGAGAAGTCCC<br>R: ACAGGAACAGTTTCACGTTG            | 116       |
| GAPDH | F: GAGTCAACGGATTTGGTCGT<br>R: GACAAGCTTCCCGTTCTCAG            | 185       |

<sup>a</sup> F, forward primer; R, reverse primer.

**Table S2. Correlation between the clinicopathologic variables and expression of CDK16 in human lung cancer tissues**

| Features          | CDK16 expression |      | P-value      |
|-------------------|------------------|------|--------------|
|                   | low              | high |              |
| <b>Sex</b>        |                  |      |              |
| Male              | 13               | 35   | 0.473        |
| Female            | 12               | 28   |              |
| <b>Age(years)</b> |                  |      |              |
| ≤60               | 15               | 25   | 0.068        |
| > 60              | 10               | 38   |              |
| <b>Tumor size</b> |                  |      |              |
| T1 (≤3cm)         | 6                | 26   | 0.137        |
| T2 (> 3cm, ≤7cm)  | 16               | 35   |              |
| T3 (> 7cm)        | 3                | 2    |              |
| <b>Stage</b>      |                  |      |              |
| I - II            | 15               | 32   | 0.294        |
| III-IV            | 10               | 31   |              |
| <b>T</b>          |                  |      |              |
| 1                 | 3                | 14   | 0.626        |
| 2                 | 14               | 35   |              |
| 3                 | 6                | 10   |              |
| 4                 | 2                | 4    |              |
| <b>N</b>          |                  |      |              |
| 0                 | 18               | 28   | <b>0.026</b> |
| 1                 | 5                | 14   |              |
| 2                 | 2                | 15   |              |
| 3                 | 0                | 6    |              |
| <b>M</b>          |                  |      |              |
| 0                 | 25               | 62   | 0.716        |
| 1                 | 0                | 1    |              |
